# Supplementary material
Source: MDPI journal article supplement (https://www.mdpi.com/2227-9717/9/11/2051)
Supplement: s1 [file s1]

SUPPLEMENTARY DATA

Optimized Organosolv Pretreatment of Biomass Residues  
Using 2-Methyltetrahydrofuran and n-Butanol

Egidio Viola, Francesco Zimbardi \*, Massimo Morgana, Nadia Cerone, Vito Valerio and Assunta Romanelli

ENEA, Department of Energy Technologies, Research Center of Trisaia, S.S.106 Jonica, 75026, Rotondella, MT, Italy; egidio.viola@enea.it (E.V.); massimo.morgana@enea.it (M.M.); nadia.cerone@enea.it (N.C.); vito.valerio@enea.it (V.V.); assunta.romanelli@enea.it (A.R.)

\* Correspondence: author: francesco.zimbardi@enea.it

DOE analysis of pretreated biomass with OS, purity of the streams.

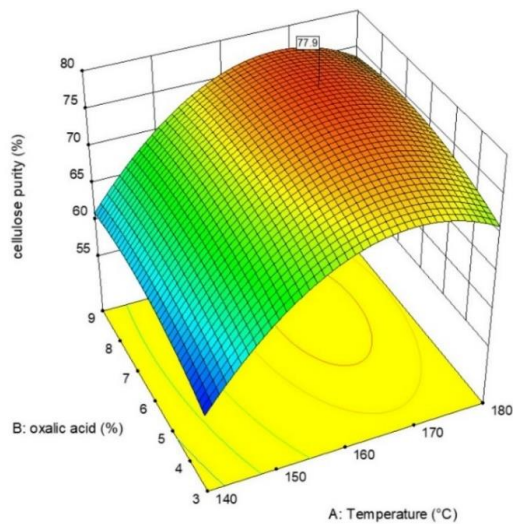

Figure S1. Purity of CF from ER pretreated with butanol as function of temperature and oxalic acid (time = 60 min.).

Commented [M1]: Please carefully check the accuracy of names and affiliations.

Commented [M2]: Affiliation 1–6 are the same, we arranged them as one Affication, please confirm this version.

Commented [M3]: Please check the address order which should be arranged from samll to large is right.

Commented [M4]: Please check if this part can be deleted, if so ,please delete.

Commented [M5]: Please add post code. (or zip code in the US).

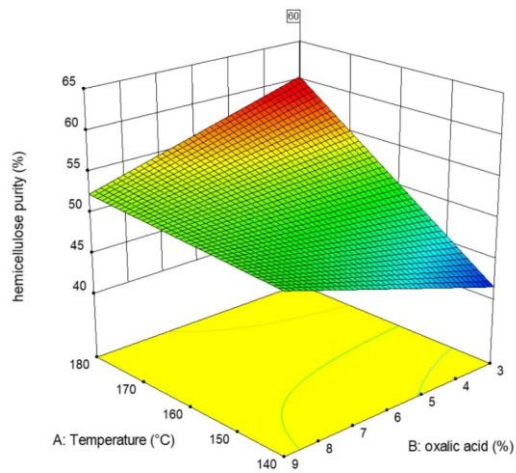

**Figure S2.** Purity of HF from ER pretreated with butanol as function of temperature and oxalic acid (time = 60 min.).

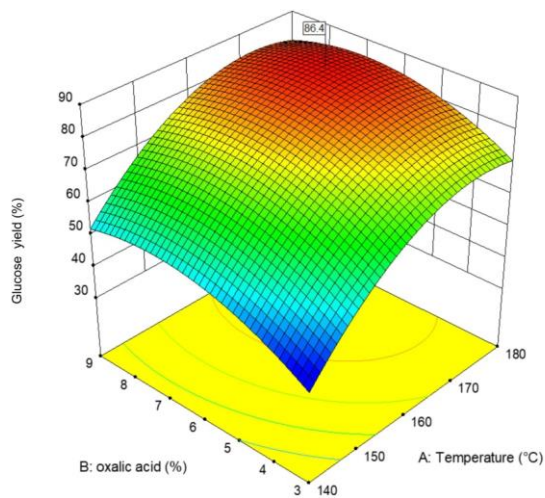

**Figure S3.** Recovery yield of glucose from ER pretreated with butanol as function of temperature and oxalic acid (time = 60 min.).

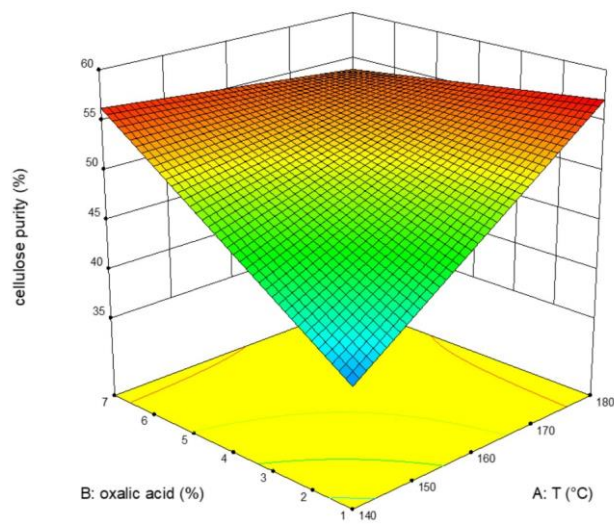

**Figure S4.** Purity of CF obtained from WS pretreated with 2M-THF as function of temperature and oxalic acid (time = 60 min).

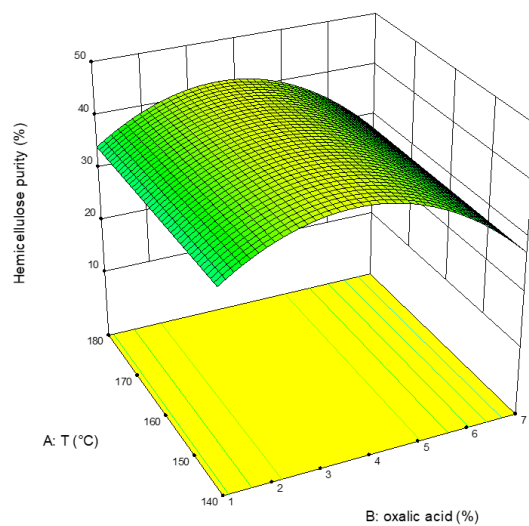

**Figure S5.** Fraction purity of HF as function of temperature and oxalic acid (WS, 2M-THF OS) (time = 60 min.).

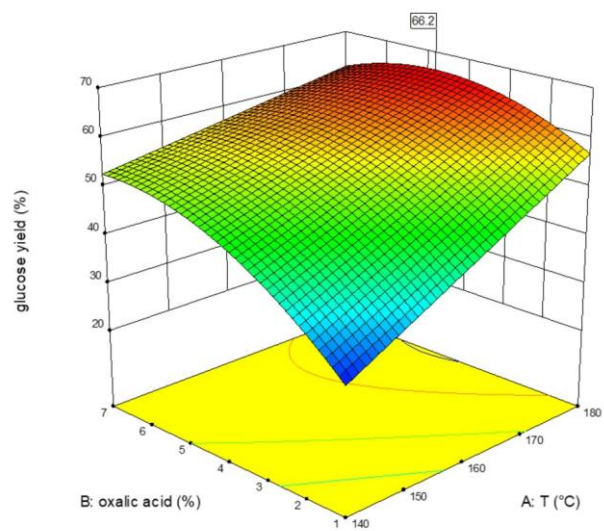

**Figure S6.** Glucose yield as function of temperature and oxalic acid (WS, 2M-THF OS) (time = 60 min.).

**Determination of the lignin purity by UV.** This measurement is based on the UV spectra of the organic solutions obtained after the pretreatments (total organic solution was 200 ml from 5 g of started material; it was diluted 1:250 before UV analysis).

In the Figure 1 the UV spectra of the organic solutions after the pretreatments (Organosolv with butanol on wheat straw).

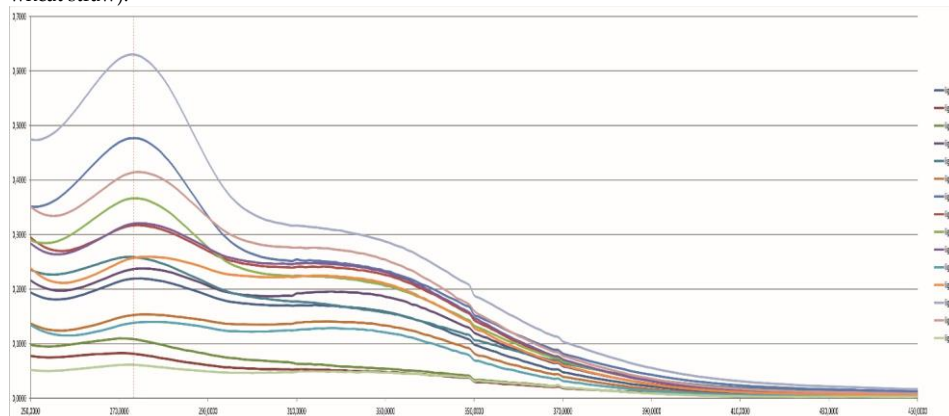

**Figure S7.** UV spectra of the organic solutions obtained from pretreatment of WS with butanol. The legend number are referred to the experimental design reported in Table2.

Data in the literature reported that the absorbance at 273 nm is characteristic of lignin [1]. The absorbance value per g of the obtained lignin fraction (abs/g) gives an indication of the lignin purity, with higher values indicating higher purity.

**Determination of the lignin purity by TGA.** This is based on the TGA profile of the dried solute in the organic phase. A TGA profile of a single sample is reported in Figure S2. In the TGA profile we can observe two flexes: the first could be assigned to the combustion of low molecular weight substances (extractives), the second could be assigned to the combustion of macromolecules (lignin). Higher values of the % area of the second inflection indicate higher abundance of macromolecules (lignin), and higher lignin purity [2].

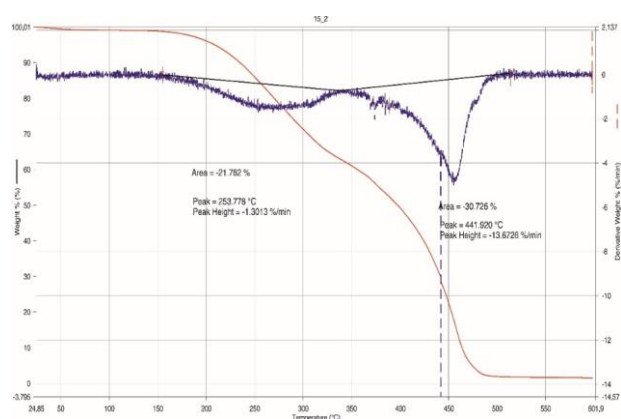

**Figure S8.** TGA profile of the dried lignin fraction from WS pretreatment with butanol as reported in Table 5.

**Trials at reduced temperature and enzyme loading.** The purpose of those tests was to verify the efficiency of the process while saving thermal energy and enzyme. The results were compared in the following figures S9- S10, with those obtained at optimized conditions at 175°C.

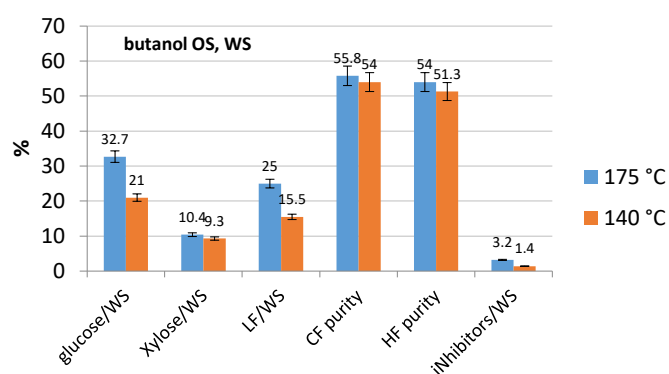

**Figure S9.** Recovery yields, purity and byproduct (inhibitors) at 140°C compared to 170°C for WS treated with butanol.

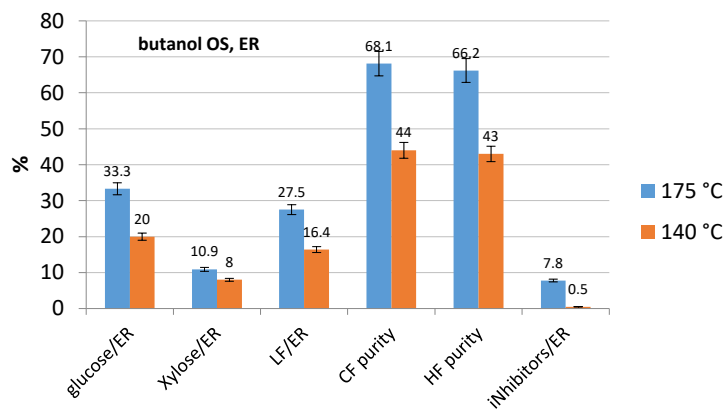

**Figure S10.** Recovery yields, purity and byproduct (inhibitors) at 140°C compared to 170°C for ER treated with butanol.

**Table S1.** DOE analysis treating straw with butanol: coefficient table with the p-value. A=temperature (°C), B=time (min), C=oxalic acid (%).

| Response             | Intercept | A        | B        | C       | AC       | BC     | A^2    | B^2    | C^2    |
|----------------------|-----------|----------|----------|---------|----------|--------|--------|--------|--------|
| cellulose purity     | 56.9857   | 3.5875   |          | 10.21   | -2.85    |        |        |        | -7.248 |
| p=                   |           | 0.0087   |          | <       | 0.0977   |        |        |        | 0.0012 |
|                      |           |          |          | 0.0001  |          |        |        |        |        |
| hemicellulose purity | 57.1036   |          |          |         | -20.6492 | -12.7  |        |        |        |
| p=                   |           |          |          |         | 0.0066   | 0.0658 |        |        |        |
| Glucose yield        | 85.8034   | 12.342   |          | 18.0196 | -13.9832 |        |        | -6.986 | -17.55 |
| p=                   |           | 0.0006   |          | <       | 0.0026   |        |        | 0.079  | 0.0008 |
|                      |           |          |          | 0.0001  |          |        |        |        |        |
| inhibitors           | 2.25446   | 1.29422  | 0.231056 | 0.959   | 0.810696 |        | 0.499  |        | 0.5575 |
| p=                   |           | < 0.0001 | 0.0741   | <       | 0.0009   |        | 0.0165 |        | 0.0097 |
|                      |           |          |          | 0.0001  |          |        |        |        |        |

Legend      p <.01   .01<= p <.05   .05<= p <.10   p >=.10

**Table S2.** DOE analysis treating eucalyptus with butanol: coefficient table with the p-value. A=temperature (°C), B=oxalic acid (%).

| RESPONSE             | INTERCEPT | A       | B        | AB       | A^2      | B^2      |
|----------------------|-----------|---------|----------|----------|----------|----------|
| CELLULOSE PURITY     | 76.2971   | 6.62    | 1.62333  | -0.24    | -8.38429 | -2.05429 |
| P=                   |           | 0.0110  | 0.3333   | 0.9008   | 0.0240   | 0.4345   |
| HEMICELLULOSE PURITY | 51.2371   | 5.15347 | 0.276769 | -4.25552 |          |          |
| P=                   |           | 0.0091  | 0.8455   | 0.0432   |          |          |
| GLUCOSE YIELD        | 80.8489   | 15.1261 | 5.85849  | -0.9283  | -12.1269 | -7.98238 |
| P=                   |           | 0.0003  | 0.0110   | 0.5934   | 0.0044   | 0.0190   |
| INHIBITORS           | 9.30071   | 4.66833 | 1.42333  | 0.6225   | -3.14143 | -1.40643 |
| P=                   |           | 0.0003  | 0.0230   | 0.2691   | 0.0078   | 0.0914   |

Legend      p <.01   .01<= p <.05   .05<= p <.10   p >=.10

**Table S3.** DOE analysis treating straw with 2MTHF: coefficient table with the p-value. A=temperature (°C), B=oxalic acid (%).

| Response             | Intercept | A        | B        | AB       | B^2      |
|----------------------|-----------|----------|----------|----------|----------|
| Cellulose purity     | 51.412    | 4.05667  | 3.65333  | -5.28    |          |
| p=                   |           | 0.0236   | 0.0349   | 0.0185   |          |
| Hemicellulose purity | 42.0843   |          | -3.3625  |          | -11.1233 |
| p=                   |           |          | 0.2222   |          | 0.0264   |
| glucose yield        | 56.5719   | 9.3431   | 7.27907  | -4.53119 | -6.31399 |
| p=                   |           | < 0.0001 | < 0.0001 | 0.0022   | 0.0016   |
| Inhibitors           | 4.999     | 3.85833  | 2.01     |          |          |
| p=                   |           | 0.0018   | 0.0393   |          |          |

Legend      p <.01   .01<= p <.05   .05<= p <.10   p >=.10

**Table S4.** Supplementary data on WS treated with butanol (inhibitors details).

|    | Formic acid, % | Acetic acid, % | 5HMF, % | Furfural, % | Total, % |
|----|----------------|----------------|---------|-------------|----------|
| 1  | 2.2            | 1.4            | 0.4     | 0.1         | 4.02     |
| 2  | 1.9            | 1.0            | 0.2     | 0.7         | 3.66     |
| 3  | 0.8            | 0.8            | 0.0     | 0.0         | 1.53     |
| 4  | 1.2            | 1.0            | 0.1     | 0.3         | 2.59     |
| 5  | 1.1            | 1.1            | 0.0     | 0.1         | 2.20     |
| 6  | 0.9            | 0.9            | 0.1     | 0.4         | 2.19     |
| 7  | 1.5            | 1.3            | 0.0     | 0.2         | 3.03     |
| 8  | 0.7            | 0.6            | 0.0     | 0.0         | 1.37     |
| 9  | 2.7            | 1.5            | 0.4     | 2.2         | 6.81     |
| 10 | 1.18           | 0.86           | 0.08    | 0.33        | 2.45     |
| 11 | 1.9            | 1.1            | 0.1     | 0.3         | 3.42     |
| 12 | 1.5            | 1.0            | 0.2     | 0.8         | 3.45     |
| 13 | 1.0            | 0.7            | 0.0     | 0.0         | 1.65     |
| 14 | 0.8            | 0.8            | 0.0     | 0.1         | 1.74     |
| 15 | 1.3            | 0.8            | 0.1     | 0.0         | 2.16     |

**Table S5.** Supplementary data on ER treated with butanol.

| RUN | T   | OXALIC ACID | LIGNIN<br>PURITY <sup>1</sup> | LIGNIN PURITY <sup>2</sup> | INHIBITORS |
|-----|-----|-------------|-------------------------------|----------------------------|------------|
|     | °C  | %           | abs/g                         | %                          | %          |
| 1   | 140 | 9           | 0.26                          | 56                         | 0.76       |
| 2   | 180 | 9           | 0.498                         | 68                         | 11.1       |
| 3   | 180 | 3           | 0.413                         | 61                         | 7.89       |
| 4   | 140 | 3           | 0.335                         | 60                         | 0.02       |
| 5   | 140 | 6           | 0.294                         | 67                         | 0.88       |
| 6   | 160 | 3           | 0.31                          | 59                         | 5.22       |
| 7   | 180 | 6           | 0.473                         | 69                         | 10.7       |
| 8   | 160 | 9           | 0.365                         | 56                         | 9.79       |
| 9   | 160 | 6           | 0.351                         | 63                         | 10.1       |
| 10  | 160 | 6           | 0.31                          | 56                         | 9.28       |

<sup>1</sup> Determinated by UV.<sup>2</sup> Determinated by TGA.

**Table S6.** Supplementary data on WS treated with butanol.

| RUN | T   | T   | OXALIC ACID | LIGNIN PURITY <sup>1</sup> | LIGNIN PURITY <sup>2</sup> |
|-----|-----|-----|-------------|----------------------------|----------------------------|
|     | °C  | min | %           | abs/g                      | %                          |
| 1   | 180 | 90  | 5           | 0.61                       | 54.8                       |
| 2   | 160 | 90  | 10          | 0.343                      | 41.9                       |
| 3   | 160 | 30  | 0           | 0.43                       | 40.7                       |
| 4   | 160 | 60  | 5           | 0.21                       | 41.2                       |
| 5   | 160 | 90  | 0           | 0.218                      | 40.8                       |
| 6   | 140 | 60  | 10          | 0.127                      | 36.5                       |
| 7   | 180 | 60  | 0           | 0.373                      | 53.7                       |
| 8   | 140 | 30  | 5           | 0.233                      | 36.4                       |
| 9   | 180 | 60  | 10          | 0.404                      | 46.6                       |
| 10  | 160 | 60  | 5           | 0.324                      | 39.4                       |
| 11  | 160 | 30  | 10          | 0.206                      | 37.8                       |
| 12  | 180 | 30  | 5           | 0.323                      | 44.9                       |
| 13  | 140 | 60  | 0           | 0.349                      | 30.7                       |
| 14  | 140 | 90  | 5           | 0.297                      | 40.2                       |
| 15  | 160 | 60  | 5           | 0.295                      | 37.8                       |

<sup>1</sup> Determinated by UV.

<sup>2</sup> Determinated by TGA.

#### REFERENCES

1. Sun R.C.; Lu Q.; Sun X.F. Physico-chemical and thermal characterization of lignins from *Caligonum monogoliacum* and *Tamarix* spp., *Polymer Degradation and Stability*, 2001, 72, 229-238.
2. Freda, C., Zimbardi, F., Nanna, F., & Viola, E., Mathematical tool from corn stover TGA to determine its composition, *Applied biochemistry and biotechnology*, 2012, 167(8), 2283-2294.
